# Supplementary material
Source: PubMed Central journal article supplement (PMC3139587)
Supplement: supp_djr216_JNCI_10_1656_s01.pdf [file supp_djr216_JNCI_10_1656_s01.pdf]

**Supplementary Table 1.** Distribution of characteristics of participants enrolled in the NCI-MD study during 1998–2003\*

| Characteristic                     | Case patients                                     |                                                  | <i>P</i> | Control subjects                                  |                                                  | <i>P</i> |
|------------------------------------|---------------------------------------------------|--------------------------------------------------|----------|---------------------------------------------------|--------------------------------------------------|----------|
|                                    | All enrolled<br>1998-2003<br>(N = 346)<br>No. (%) | With cytokine<br>results<br>(N = 270)<br>No. (%) |          | All enrolled<br>1998-2003<br>(N = 381)<br>No. (%) | With cytokine<br>results<br>(N = 296)<br>No. (%) |          |
| Age, y                             |                                                   |                                                  |          |                                                   |                                                  |          |
| Mean (SD)                          | 66.9 (10.2)                                       | 66.6 (10.0)                                      | .72†     | 65.5 (10.2)                                       | 65.2 (10.4)                                      | .71†     |
| Sex                                |                                                   |                                                  |          |                                                   |                                                  |          |
| Men                                | 172 (49.7)                                        | 142 (52.6)                                       | .48‡     | 183 (48.0)                                        | 148 (50.0)                                       | .61‡     |
| Women                              | 174 (50.3)                                        | 128 (47.4)                                       |          | 198 (52.0)                                        | 148 (50.0)                                       |          |
| Smoking status                     |                                                   |                                                  |          |                                                   |                                                  |          |
| Never                              | 26 (7.5)                                          | 22 (8.2)                                         | .97‡     | 110 (29.0)                                        | 86 (29.2)                                        | .98‡     |
| Former quit ≤15 y                  | 77 (22.3)                                         | 57 (21.1)                                        |          | 92 (24.3)                                         | 68 (23.1)                                        |          |
| Former quit >15 y                  | 83 (24.1)                                         | 63 (23.4)                                        |          | 102 (26.9)                                        | 82 (27.8)                                        |          |
| Current                            | 159 (46.1)                                        | 127 (47.2)                                       |          | 75 (19.8)                                         | 59 (20.0)                                        |          |
| Pack-years, mean (SD)§             | 46.6 (26.0)                                       | 47.8 (26.4)                                      | .59†     | 39.4 (30.3)                                       | 39.7 (31.3)                                      | .92†     |
| Smoking duration, y, mean (SD)§    | 40.6 (13.0)                                       | 40.5 (12.8)                                      | .93†     | 33.9 (15.3)                                       | 33.3 (15.5)                                      | .67†     |
| Education                          |                                                   |                                                  |          |                                                   |                                                  |          |
| High school or less                | 184 (59.0)                                        | 146 (60.1)                                       | .79‡     | 174 (52.3)                                        | 127 (49.8)                                       | .56‡     |
| Some college or higher             | 128 (41.0)                                        | 97 (39.9)                                        |          | 159 (47.8)                                        | 128 (50.2)                                       |          |
| Regular aspirin or ibuprofen use   |                                                   |                                                  |          |                                                   |                                                  |          |
| No                                 | 224 (65.1)                                        | 174 (64.7)                                       | .91‡     | 197 (51.7)                                        | 145 (49.0)                                       | .48‡     |
| Yes                                | 120 (34.9)                                        | 95 (35.3)                                        |          | 184 (48.3)                                        | 151 (51.0)                                       |          |
| BMI, kg/m <sup>2</sup>             |                                                   |                                                  |          |                                                   |                                                  |          |
| <26.5                              | 99 (28.6)                                         | 74 (27.4)                                        | .74‡     | 71 (18.6)                                         | 52 (17.6)                                        | .72‡     |
| ≥26.5                              | 247 (71.4)                                        | 196 (72.6)                                       |          | 310 (81.4)                                        | 244 (82.4)                                       |          |
| History of heart disease           |                                                   |                                                  |          |                                                   |                                                  |          |
| No                                 | 258 (75.2)                                        | 204 (76.1)                                       | .80‡     | 282 (74.0)                                        | 217 (73.3)                                       | .84‡     |
| Yes                                | 85 (24.8)                                         | 64 (23.9)                                        |          | 99 (26.0)                                         | 79 (26.7)                                        |          |
| History of emphysema or bronchitis |                                                   |                                                  |          |                                                   |                                                  |          |
| No                                 | 265 (77.0)                                        | 204 (75.8)                                       | .73‡     | 290 (76.1)                                        | 225 (76.0)                                       | .98‡     |
| Yes                                | 79 (22.0)                                         | 65 (24.2)                                        |          | 91 (23.9)                                         | 71 (24.0)                                        |          |
| Family history of lung cancer      |                                                   |                                                  |          |                                                   |                                                  |          |
| No                                 | 282 (82.0)                                        | 221 (82.2)                                       | .95‡     | 326 (85.6)                                        | 253 (85.5)                                       | .97‡     |
| Yes                                | 62 (18.0)                                         | 48 (17.8)                                        |          | 55 (14.4)                                         | 43 (14.5)                                        |          |
| Histology                          |                                                   |                                                  |          |                                                   |                                                  |          |

|             |            |            |      |   |   |
|-------------|------------|------------|------|---|---|
| AC          | 121 (41.2) | 105 (42.9) | .94‡ | – | – |
| SCC         | 61 (20.8)  | 53 (21.6)  |      | – | – |
| NSCLC, NOS  | 75 (25.5)  | 59 (24.1)  |      | – | – |
| Other       | 37 (12.6)  | 28 (11.4)  |      | – | – |
| Tumor stage |            |            |      |   |   |
| I           | 146 (72.6) | 104 (71.2) | .77‡ | – | – |
| II-IV       | 55 (27.4)  | 42 (28.8)  |      | – | – |

\* – = Not applicable; NCI-MD = National Cancer Institute-Maryland study; y = year; SD = standard deviation; BMI = body mass index; AC = adenocarcinoma; SCC = squamous cell carcinoma; NSCLC, NOS = non small cell lung cancer, not otherwise specified.

† *P* values were calculated using a two-sided Student *t* test.

‡ *P* values were calculated using a two-sided  $\chi^2$  test.

§ Excludes individuals who had never smoked.

|| Numbers do not add to 100% of total because of missing information.

**Supplementary Table 2.** Quality control metrics for raw data for cytokine measurements\*

| Category                                 | Interleukin-6 |           | Interleukin-8 |           |
|------------------------------------------|---------------|-----------|---------------|-----------|
|                                          | NCI-MD        | PLCO      | NCI-MD        | PLCO      |
| Intra-Plate                              |               |           |               |           |
| Spearman's correlation coefficient†      | 0.99          | 0.84      | 0.87          | 0.92      |
| <i>P</i> ‡                               | <.001         | <.001     | <.001         | <.001     |
| Inter-Plate                              |               |           |               |           |
| Spearman's correlation coefficient†      | 0.81          | 0.78      | 0.86          | 0.76      |
| <i>P</i> ‡                               | <.001         | <.001     | <.001         | <.001     |
| Average limit of detection (pg/mL) §     | 0.40          | 0.11      | 0.12          | 0.10      |
| Samples below detection limit (%)        | 2 (0.2)       | 0 (0.0)   | 0 (0.0)       | 0 (0.0)   |
| Coefficient of variation % (mean, pg/mL) |               |           |               |           |
| Low                                      | 46 (1.6)      | 33 (15.2) | 36 (16.3)     | 48 (16.2) |
| Medium                                   | 8 (49)        | 27 (110)  | 10 (269)      | 22 (118)  |
| High                                     | 8 (1024)      | 15 (1066) | 10 (1087)     | 1 (1190)  |

\* Quality control was tested by analyzing the correlation of duplicate samples within plates (intra-plate) and across plates (inter-plate). NCI-MD = National Cancer Institute-Maryland study; PLCO = Prostate, Lung, Colorectal and Ovarian cancer screening trial.

† A Spearman's correlation test was performed.

‡ *P* values were based on a two-sided Gaussian approximation.

§ The detection limit for each plate was determined based on linearity of standard curve.

|| The coefficient of variation was calculated for laboratory controls (low, medium and high) included on each plate.

**Supplementary Table 3.** Association of interleukin-6 and interleukin-8 serum levels with lung cancer across NCI-MD control groups\*

| Cytokine level            | No. of case patients | No. of population control subjects | OR (95% CI)†         | $P_{\text{trend}}‡$  | No. of hospital control subjects | OR (95% CI)†        | $P_{\text{trend}}‡$ |
|---------------------------|----------------------|------------------------------------|----------------------|----------------------|----------------------------------|---------------------|---------------------|
| <b>IL-6</b>               |                      |                                    |                      |                      |                                  |                     |                     |
| 1 <sup>st</sup> Quartile§ | 27                   | 51                                 | 1.00 (referent)      | $3.3 \times 10^{-7}$ | 22                               | 1.00 (referent)     | .001                |
| 2 <sup>nd</sup> Quartile  | 30                   | 45                                 | 1.20 (0.55 to 2.62)  |                      | 30                               | 0.84 (0.38 to 1.87) |                     |
| 3 <sup>rd</sup> Quartile  | 83                   | 31                                 | 3.61 (1.73 to 7.53)  |                      | 43                               | 1.58 (1.18 to 4.72) |                     |
| 4 <sup>th</sup> Quartile  | 130                  | 31                                 | 4.97 (2.43 to 10.17) |                      | 43                               | 2.36 (1.18 to 4.72) |                     |
| Low IL-6                  | 57                   | 96                                 | 1.00 (referent)      | $1.4 \times 10^{-7}$ | 52                               | 1.00 (referent)     | .001                |
| High IL-6                 | 213                  | 62                                 | 3.92 (2.36 to 6.52)  |                      | 86                               | 2.17 (1.34 to 3.61) |                     |
| <b>IL-8</b>               |                      |                                    |                      |                      |                                  |                     |                     |
| 1 <sup>st</sup> Quartile§ | 34                   | 47                                 | 1.00 (referent)      | .006                 | 27                               | 1.00 (referent)     | .03                 |
| 2 <sup>nd</sup> Quartile  | 57                   | 37                                 | 1.78 (0.85 to 3.72)  |                      | 37                               | 1.22 (0.61 to 2.42) |                     |
| 3 <sup>rd</sup> Quartile  | 96                   | 34                                 | 3.70 (1.82 to 7.50)  |                      | 40                               | 1.98 (1.03 to 3.81) |                     |
| 4 <sup>th</sup> Quartile  | 83                   | 40                                 | 2.31 (1.14 to 4.68)  |                      | 34                               | 1.83 (0.93 to 3.61) |                     |
| Low IL-8                  | 91                   | 84                                 | 1.00 (referent)      | .002                 | 64                               | 1.00 (referent)     | .02                 |
| High IL-8                 | 179                  | 74                                 | 2.18 (1.34 to 3.54)  |                      | 74                               | 1.70 (1.09 to 2.63) |                     |

\* NCI-MD = National Cancer Institute-Maryland study; IL-6 = interleukin-6; IL-8 = interleukin-8; OR = odds ratio; CI = confidence interval.

† Multivariable unconditional logistic regression analysis adjusted for age (continuous), gender, smoking pack-years (continuous), smoking status (never, former quit  $\leq$  15 years, former quit  $>$ 15 years, current).

‡  $P$  values were calculated using a two-sided Wald  $\chi^2$  statistic.

§ Quartiles (25%, 50%, 75%) were based on serum IL-6 and IL-8 cut-off levels among controls in NCI-MD study (IL-6, 1.4, 2.1, 3.8 pg/mL; IL-8 7.0, 10.8 and 28.5 pg/mL).

|| Serum IL-6 and IL-8 levels were dichotomized into  $\leq$  the median vs  $>$  the median among controls in the NCI-MD study (IL-6, 2.1 pg/mL; IL-8 10.8 pg/mL).

**Supplementary Table 4.** Association of interleukin-6 and interleukin-8 serum levels with lung cancer in the NCI-MD study and with lung cancer risk in the PLCO study, adjusted for potential confounding\*

| Cytokine and level        | NCI-MD                       |                      |                              | PLCO                         |                      |                              |                      |     |
|---------------------------|------------------------------|----------------------|------------------------------|------------------------------|----------------------|------------------------------|----------------------|-----|
|                           | Adjustment 1†<br>OR (95% CI) | $P_{\text{trend}}$ ‖ | Adjustment 2‡<br>OR (95% CI) | Adjustment 1†<br>OR (95% CI) | $P_{\text{trend}}$ ‖ | Adjustment 2§<br>OR (95% CI) | $P_{\text{trend}}$ ‖ |     |
| <b>IL-6</b>               |                              |                      |                              |                              |                      |                              |                      |     |
| 1 <sup>st</sup> Quartile¶ | 1.00 (referent)              | $5.9 \times 10^{-6}$ | 1.00 (referent)              | $1.1 \times 10^{-5}$         | 1.00 (referent)      | .03                          | 1.00 (referent)      | .04 |
| 2 <sup>nd</sup> Quartile  | 0.85 (0.42 to 1.72)          |                      | 0.87 (0.43 to 1.76)          |                              | 1.09 (0.73 to 1.63)  |                              | 1.09 (0.72 to 1.63)  |     |
| 3 <sup>rd</sup> Quartile  | 2.02 (1.07 to 3.84)          |                      | 2.06 (1.08 to 3.91)          |                              | 1.16 (0.78 to 1.74)  |                              | 1.14 (0.76 to 1.72)  |     |
| 4 <sup>th</sup> Quartile  | 3.01 (1.62 to 5.61)          |                      | 2.95 (1.58 to 5.50)          |                              | 1.52 (1.03 to 2.25)  |                              | 1.49 (1.00 to 2.22)  |     |
| <b>IL-8</b>               |                              |                      |                              |                              |                      |                              |                      |     |
| 1 <sup>st</sup> Quartile¶ | 1.00 (referent)              | $4.7 \times 10^{-4}$ | 1.00 (referent)              | $4.7 \times 10^{-4}$         | 1.00 (referent)      | .02                          | 1.00 (referent)      | .05 |
| 2 <sup>nd</sup> Quartile  | 1.31 (0.66 to 2.62)          |                      | 1.39 (0.69 to 2.80)          |                              | 0.96 (0.64 to 1.45)  |                              | 0.93 (0.62 to 1.41)  |     |
| 3 <sup>rd</sup> Quartile  | 3.41 (1.82 to 6.41)          |                      | 3.42 (1.81 to 6.46)          |                              | 1.19 (0.80 to 1.78)  |                              | 1.18 (0.79 to 1.76)  |     |
| 4 <sup>th</sup> Quartile  | 2.52 (1.35 to 4.69)          |                      | 2.59 (1.38 to 4.86)          |                              | 1.46 (1.00 to 2.14)  |                              | 1.37 (0.93 to 2.02)  |     |

\* IL-6 = interleukin-6; IL-8 = interleukin-8; OR = odds ratio; CI = confidence ratio; NCI-MD = National Cancer Institute-Maryland study; PLCO = Prostate, Lung, Colorectal and Ovarian cancer screening trial.

† Multivariable unconditional logistic regression adjusted for age (continuous), gender, smoking pack-years (continuous), smoking status (never, former quit  $\leq 15$  years, former quit  $>15$  years, current), heart disease (no, yes), family history of lung cancer (no, yes), body mass index (continuous), education (high school or less, more than high school), regular use of aspirin or ibuprofen (yes, no).

‡ Same model as “Adjustment 1” in NCI-MD study, and additionally adjusted for chronic bronchitis, emphysema, adult asthma, asbestosis, tuberculosis, pneumonia, lupus, and arthritis (all categorized as yes vs no).

§ Same model as “Adjustment 1” in PLCO study, and additionally adjusted for chronic bronchitis (yes, no) and emphysema (yes, no).

‖  $P$  values were calculated using a two-sided Wald  $\chi^2$  statistic.

¶ Quartiles (25%, 50%, 75%) were based on serum IL-6 and IL-8 cut-off levels among controls in NCI-MD study (IL-6, 1.4, 2.1, 3.8 pg/mL; IL-8 7.0, 10.8 and 28.5 pg/mL) and PLCO study (IL-6, 2.7, 4.0, 6.6 pg/mL; IL-8, 13.1, 17.4, 23.3 pg/mL).

**Supplementary Table 5.** Serum interleukin-6 and interleukin-8 levels as predictors of demographic and clinicopathologic features\*

| Characteristic                      | IL-6                    |             |                         |             | IL-8                    |                      |                         |             |
|-------------------------------------|-------------------------|-------------|-------------------------|-------------|-------------------------|----------------------|-------------------------|-------------|
|                                     | NCI-MD                  |             | PLCO                    |             | NCI-MD                  |                      | PLCO                    |             |
|                                     | Median level<br>(pg/mL) | <i>P</i> †‡ | Median level<br>(pg/mL) | <i>P</i> †‡ | Median level<br>(pg/mL) | <i>P</i> †‡          | Median level<br>(pg/mL) | <i>P</i> †‡ |
| Age, years                          |                         |             |                         |             |                         |                      |                         |             |
| <65                                 | 2.0                     | .58         | 3.9                     | .06         | 9.0                     | .13                  | 17.0                    | .15         |
| ≥65                                 | 2.2                     |             | 4.3                     |             | 12.0                    |                      | 17.6                    |             |
| Gender                              |                         |             |                         |             |                         |                      |                         |             |
| Male                                | 2.2                     | .75         | 4.0                     | .17         | 11.8                    | .42                  | 17.4                    | .19         |
| Female                              | 2.1                     |             | 3.9                     |             | 10.1                    |                      | 17.5                    |             |
| Smoking status                      |                         |             |                         |             |                         |                      |                         |             |
| Never                               | 1.6                     | .006        | 3.7                     | .003        | 8.3                     | .005                 | 16.0                    | .30         |
| Former quit >15 years               | 2.0                     |             | 3.8                     |             | 13.1                    |                      | 18.1                    |             |
| Former quit ≤15 years               | 2.5                     |             | 3.6                     |             | 10.2                    |                      | 17.6                    |             |
| Current                             | 3.8                     |             | 4.6                     |             | 12.7                    |                      | 17.3                    |             |
| Education                           |                         |             |                         |             |                         |                      |                         |             |
| High school or less                 | 2.4                     | .09         | 4.4                     | .03         | 11.3                    | .12                  | 18.6                    | .05         |
| College or higher                   | 2.0                     |             | 3.7                     |             | 9.9                     |                      | 16.8                    |             |
| Regular aspirin or<br>Ibuprofen use |                         |             |                         |             |                         |                      |                         |             |
| No                                  | 2.2                     | .43         | 3.8                     | .27         | 9.7                     | .17                  | 17.3                    | .70         |
| Yes                                 | 2.1                     |             | 4.0                     |             | 11.1                    |                      | 17.4                    |             |
| BMI, kg/m <sup>2</sup>              |                         |             |                         |             |                         |                      |                         |             |
| <26.5                               | 1.8                     | .04         | 3.9                     | .02         | 11.2                    | .41                  | 18.7                    | .001        |
| ≥26.5                               | 2.2                     |             | 4.3                     |             | 10.5                    |                      | 16.4                    |             |
| History of heart disease            |                         |             |                         |             |                         |                      |                         |             |
| No                                  | 2.0                     | .24         | 4.1                     | .76         | 8.9                     | 2 × 10 <sup>-4</sup> | 17.2                    | .07         |
| Yes                                 | 2.6                     |             | 3.7                     |             | 19.5                    |                      | 18.1                    |             |
| History of<br>Emphysema/bronchitis  |                         |             |                         |             |                         |                      |                         |             |
| No                                  | 1.9                     | .71         | 3.9                     | .56         | 9.7                     | .24                  | 17.4                    | .09         |
| Yes                                 | 2.8                     |             | 4.3                     |             | 11.3                    |                      | 18.1                    |             |

Family history of  
Lung cancer

|     |     |     |     |     |      |     |      |     |
|-----|-----|-----|-----|-----|------|-----|------|-----|
| No  | 2.8 | .19 | 3.9 | .42 | 9.8  | .09 | 17.4 | .49 |
| Yes | 2.1 |     | 5.2 |     | 12.7 |     | 17.8 |     |

---

\* NCI-MD = National Cancer Institute-Maryland study; PLCO = Prostate, Lung, Colorectal and Ovarian cancer screening trial; IL-6 = interleukin-6; IL-8 = interleukin-8.

† Linear regression models among control subjects incorporating age, gender, and smoking for NCI-MD and PLCO, and additionally year of randomization and years in study for PLCO.

‡ *P* values were based on a two-sided Gaussian approximation.

**Supplementary Table 6.** Standardized 10-year absolute risks of lung cancer across interleukin-8 and C-reactive protein levels among former and current smokers\*

| Category                                       | Absolute risk, %<br>(95% CI) | Standardized<br>absolute risk<br>difference (95% CI)† |
|------------------------------------------------|------------------------------|-------------------------------------------------------|
| Former smokers                                 |                              |                                                       |
| Low IL-8 and low CRP‡                          | 1.26 (0.84 to 1.89)          | 1.00 (referent)                                       |
| High IL-8 and low CRP or low IL-8 and high CRP | 1.53 (1.16 to 2.02)          | 0.27 (-0.42 to 0.97)                                  |
| High IL-8 and high CRP                         | 3.18 (2.15 to 4.68)          | 1.92 (0.57 to 3.27)                                   |
| Current smokers                                |                              |                                                       |
| Low IL-8 and low CRP                           | 3.17 (1.93 to 5.20)          | 1.00 (referent)                                       |
| High IL-8 and low CRP or low IL-8 and high CRP | 6.42 (4.85 to 8.46)          | 3.25 (0.90 to 5.59)                                   |
| High IL-8 and high CRP                         | 8.01 (5.77 to 11.05)         | 4.83 (1.84 to 7.83)                                   |

\* IL-8 = interleukin-8, CRP = C-reactive protein; CI = confidence interval.

† Absolute risks were standardized to the distributions of the following variables in the Prostate, Lung, Colorectal, and Ovarian Cancer Screening Trial's screening-arm cohort: age, sex, year of randomization, smoking duration and intensity, and time since quitting (for former smokers).

‡ Low vs high IL-8 and CRP levels were dichotomized by the median values among control subjects (IL-8, 17.4 pg/mL; CRP, 2.7 mg/mL).
